# Supplementary material
Source: PubMed Central journal article supplement (PMC4892845)
Supplement: NIHMS787672-supplement-01.pdf [file NIHMS787672-supplement-01.pdf]

**Appendix 1. Characteristics of Acute Care Hospitals Participating in the Texas Gulf Coast Sepsis Network (TGCSN), 2011 Data and Facility Plans for the Sepsis Early Recognition and Response Initiative (SERRI)\***

| Facility Attributes                                        | Acute Care Hospital 1 (Convener Facility, HHM) <sup>†</sup> | Acute Care Hospital 2                 | Acute Care Hospital 3            | Acute Care Hospital 4 <sup>‡</sup>                                                                                                                                                         | Acute Care Hospital 5                                                                        | Acute Care Hospital 6                                                                                                      | Total         |
|------------------------------------------------------------|-------------------------------------------------------------|---------------------------------------|----------------------------------|--------------------------------------------------------------------------------------------------------------------------------------------------------------------------------------------|----------------------------------------------------------------------------------------------|----------------------------------------------------------------------------------------------------------------------------|---------------|
| Type                                                       | Not for profit, church owned                                | Not for profit, church owned          | Not for profit, church owned     | For profit, investor owned                                                                                                                                                                 | For profit, investor owned                                                                   | Not for profit, church owned                                                                                               | —             |
| Part of multihospital system                               | Yes                                                         | Yes                                   | Yes                              | Yes                                                                                                                                                                                        | Yes                                                                                          | No                                                                                                                         | —             |
| Electronic health record system                            | Allscripts SCM 5.5 <sup>®§</sup>                            | Allscripts SCM 5.5 <sup>®§</sup>      | Allscripts SCM 5.5 <sup>®§</sup> | MediTech <sup>®</sup>                                                                                                                                                                      | MediTech <sup>®</sup>                                                                        | MediTech <sup>®</sup>                                                                                                      | —             |
| No. of adult beds                                          | 779                                                         | 166                                   | 140                              | 391                                                                                                                                                                                        | 320                                                                                          | 199                                                                                                                        | 1,995         |
| No. of ICU beds                                            | 134                                                         | 20                                    | 24                               | 42                                                                                                                                                                                         | 26                                                                                           | 36                                                                                                                         | 282           |
| Surgery volume <sup>  </sup>                               | 15,495                                                      | 3,750                                 | 2,306                            | 4,992                                                                                                                                                                                      | 4,368                                                                                        | 3,883                                                                                                                      | 34,794        |
| No. of discharges, total                                   | 36,613                                                      | 11,092                                | 12,667                           | 18,331                                                                                                                                                                                     | 12,907                                                                                       | 16,295                                                                                                                     | 107,905       |
| No. (%) discharges that are sepsis-associated <sup>#</sup> | 1,563 (4.3)                                                 | 703 (6.3)                             | 533 (4.2)                        | 1,217 (6.6)                                                                                                                                                                                | 949 (7.4)                                                                                    | 821 (5.0)                                                                                                                  | 5,786 (5.4)   |
| No. (%) discharges reimbursed by CMS                       | 20,936 (57.2)                                               | 5,617 (50.6)                          | 8,270 (65.3)                     | 12,245 (66.8)                                                                                                                                                                              | 9,179 (71.1)                                                                                 | 7,744 (47.5)                                                                                                               | 63,991 (59.3) |
| No. (%) discharges that were Medicare beneficiaries        | 18,605 (50.8)                                               | 4,850 (43.7)                          | 5,941 (46.9)                     | 4,836 (26.4)                                                                                                                                                                               | 3,652 (28.3)                                                                                 | 5,948 (36.5)                                                                                                               | 43,832 (40.6) |
| No. (%) discharges that were Medicaid beneficiaries        | 2,331 (6.4)                                                 | 767 (6.9)                             | 2,329 (18.4)                     | 7,409 (40.4)                                                                                                                                                                               | 5,527 (42.8)                                                                                 | 1,796 (11.0)                                                                                                               | 20,159 (18.7) |
| <b>Facility Plans for SERRI</b>                            |                                                             |                                       |                                  |                                                                                                                                                                                            |                                                                                              |                                                                                                                            |               |
| Units, types of patients to be targeted                    | 1 ICU, 1 IMCU, 1 Obs, 22 medical/surgical units             | 1 ED, 1 ICU, 6 medical/surgical units | 1 ED, 4 medical/surgical units   | <b>Campus 1:</b> 1 ICU, 1 IMCU, 5 medical/surgical units (includes 1 telemetry, 1 surgical, 2 medical, 1 geriatric/psychiatry)<br><b>Campus 2:</b> 1 ICU, 1 IMCU, 3 medical/surgical units | 6 medical/surgical units (includes 2 medical, 1 surgical, 1 stroke, 1 oncology, 1 telemetry) | 6 medical/surgical units (includes 1 medical, 1 surgical, 1 stroke, 1 oncology, 1 pediatric [adult overflow], 1 telemetry) | —             |

(continued on page AP2)

**Appendix 1. Characteristics of Acute Care Hospitals Participating in the Texas Gulf Coast Sepsis Network (TGCSN), 2011 Data and Facility Plans for the Sepsis Early Recognition and Response Initiative (SERRI)\* (continued)**

| Facility Plans for SERRI                                                                                                                                  | Acute Care Hospital 1 (Convener Facility, HMH) <sup>†</sup> | Acute Care Hospital 2                   | Acute Care Hospital 3                    | Acute Care Hospital 4 <sup>‡</sup>       | Acute Care Hospital 5                   | Acute Care Hospital 6                    | Total |
|-----------------------------------------------------------------------------------------------------------------------------------------------------------|-------------------------------------------------------------|-----------------------------------------|------------------------------------------|------------------------------------------|-----------------------------------------|------------------------------------------|-------|
| % hospitalwide sepsis-associated stays <sup>#</sup> (not just SERRI units) that are screened and part of SERRI at full SERRI implementation <sup>**</sup> | 73.0<br>(fully implemented Nov 18, 2013)                    | 81.0<br>(fully implemented Dec 9, 2013) | 87.0<br>(fully implemented Feb 24, 2013) | 98.0<br>(fully implemented May 28, 2013) | 91.0<br>(fully implemented Jun 3, 2013) | 57.0<br>(fully implemented Oct 15, 2013) | —     |
| % stays covered by SERRI, regardless of whether sepsis-associated <sup>#</sup> or not, that are of CMS beneficiaries <sup>††</sup>                        | 52.4                                                        | 45.0                                    | 56.2                                     | 51.6                                     | 60.8                                    | 56.6                                     | —     |

IMCU, intermediate care unit; Obs, observation (unit); ED, emergency department.

\* Data given are for 2011, the year the SERRI project was proposed to the Centers for Medicare & Medicaid Services (CMS) Innovation Center.

<sup>†</sup> At the convener facility, Houston Methodist Hospital (HMH), the SERRI award enabled expansion of the sepsis program to additional clinical units.

<sup>‡</sup> This site has two campuses separated by more than 10 miles but operates under one license.

<sup>§</sup> An Allscripts<sup>®</sup> product modified to meet local requirements.

<sup>||</sup> Includes cardiac, vascular, neurosurgery, general surgery, orthopedics, obstetrics/gynecology, and urology procedures.

<sup>#</sup> A sepsis-associated stay in an acute care hospital is defined as a stay with one or more International Classification of Diseases, Ninth Revision, Clinical Modification (ICD-9-CM) codes for sepsis listed on the discharge abstract.

<sup>\*\*</sup> This is a measure of the extent to which the type and number of clinical units targeted for SERRI coverage in an acute care hospital, taken together, cover all the patients treated for or with sepsis at that hospital.

<sup>††</sup> CMS beneficiaries (adults) include persons enrolled in traditional Medicare (Medicare Parts A and B), Medicare Advantage (Medicare Part C), Medicaid, and those covered by Medicare as well as Medicaid. The percentage is based on persons screened after full SERRI implementation at the site.

**Appendix 2. Characteristics of Long Term Acute Care Hospitals (LTACHs) and Skilled Nursing Facilities (SNFs) Participating in the Texas Gulf Coast Sepsis Network, and 2011 Data Facility Plans for the Sepsis Early Recognition and Response Initiative (SERRI)\***

| Facility Attributes                                                                                                        | LTACH 1                      | LTACH 2                    | LTACH 3                    | LTACH 4                    | Total           |
|----------------------------------------------------------------------------------------------------------------------------|------------------------------|----------------------------|----------------------------|----------------------------|-----------------|
| Type                                                                                                                       | For profit, investor owned   | For profit, investor owned | For profit, investor owned | For profit, investor owned | —               |
| Part of multihospital system                                                                                               | Yes                          | Yes                        | Yes                        | Yes                        | —               |
| Medical record system                                                                                                      | ProTouch®                    | ProTouch®                  | Paper                      | Paper                      | —               |
| No. of adult beds                                                                                                          | 91                           | 62                         | 80                         | 73                         | 306             |
| No. of ICU beds                                                                                                            | 9                            | 12                         | 6                          | 10                         | 37              |
| No. of discharges, total                                                                                                   | 882                          | 938                        | 593                        | 769                        | 3,182           |
| No. (%) discharges that were Medicare beneficiaries                                                                        | 552<br>(62.6)                | 795<br>(84.8)              | 339<br>(57.2)              | 414<br>(53.8)              | 2,100<br>(66.0) |
| Percentage of returns to acute care hospitals that are for suspected sepsis†                                               | Not available                | Not available              | 37                         | 74                         | —               |
| <b>Facility Plans for SERRI</b>                                                                                            |                              |                            |                            |                            |                 |
| No. (%) beds targeted for SERRI                                                                                            | 100<br>(100)                 | 74<br>(100)                | 86<br>(100)                | 83<br>(100)                | 343<br>(100)    |
| % Medicare beneficiaries to be targeted                                                                                    | 100                          | 100                        | 100                        | 100                        | 100             |
| % stays covered by SERRI that are of CMS beneficiaries since launch of SERRI (all 4 LTACHs launched SERRI in October 2013) | 55.9                         | 83.1                       | 72.3                       | 96.0                       | —               |
| <b>Facility Attributes</b>                                                                                                 |                              |                            |                            |                            |                 |
|                                                                                                                            | <b>SNF 1</b>                 | <b>SNF 2</b>               | <b>SNF 3</b>               | <b>SNF 4</b>               | <b>TOTAL</b>    |
| Electronic health record system                                                                                            | Allscripts SCM 5.5®‡         | Allscripts SCM 5.5®‡       | PointClickCare®            | PointClickCare®            | —               |
| No. of licensed skilled nursing beds, adults                                                                               | 50                           | 58                         | 100                        | 112                        | 320             |
| No. of stays (admissions) 2012                                                                                             | 1,152                        | 751                        | 108                        | 293                        | 2,304           |
| % stays with Medicare as payer                                                                                             | 62.0                         | 89.0                       | 65.0                       | 65.0                       | —               |
| No. (%) Medicare-paid SNF stays that have a return to an acute care hospital within the first 30 days of the SNF stay§     | 187<br>(16.3)<br>(2012 data) | 69<br>(9.1)<br>(2012 data) | Not yet available          | Not yet available          | —               |
| <b>Facility Plans for SERRI</b>                                                                                            |                              |                            |                            |                            |                 |
| No. (%) adult beds targeted                                                                                                | 50<br>(100)                  | 58<br>(100)                | 100<br>(100)               | 112<br>(100)               | 320<br>(100)    |
| No. of Medicare beneficiaries to be targeted                                                                               | 714                          | 668                        | 70                         | 190                        | 1642            |

CMS, Centers for Medicare & Medicaid Services; TGCSN, Texas Gulf Coast Sepsis Network.

\* Data given are for 2011, the year the SERRI project was proposed to the CMS Innovation Center, with the exception of the SNFs, which joined the TGCSN in 2013 and for which 2012 data are given.

† At the time a patient in an LTACH or SNF is nonelectively returned back to an acute care hospital for a sudden deterioration in condition, the LTACH or SNF has no way to confirm what is actually the medical cause of the deterioration; LTACH and SNF personnel may suspect that it is due to sepsis and record that suspicion, but confirmation can be done only at the receiving facility.

‡ An Allscripts® product modified to meet local requirements.

§ These returns to acute care may or may not be for sepsis.

|| Computed by multiplying the number of stays in 2012 by the percentage of stays for which Medicare was the payer.

**Appendix 3. Tailoring and Staggering of Sepsis Early Recognition and Response Initiative (SERRI) Implementation Elements to Accommodate Site-Specific Realities and Conditions**

| Facility Attributes                      | ACH 1<br>(Convener facility, HMH) | ACH 2                        | ACH 3                           | ACH 4*                       | ACH 5                        | ACH 6                                                                 | LTACH 1                                           | LTACH 2                                           | LTACH 3                                           | LTACH 4                                           | SNF 1               | SNF 2                                      | SNF 3                                          | SNF 4                                          |
|------------------------------------------|-----------------------------------|------------------------------|---------------------------------|------------------------------|------------------------------|-----------------------------------------------------------------------|---------------------------------------------------|---------------------------------------------------|---------------------------------------------------|---------------------------------------------------|---------------------|--------------------------------------------|------------------------------------------------|------------------------------------------------|
| Type of first responder                  | RN                                | RN                           | RN                              | RN, LVN                      | RN, LVN                      | RN, LVN                                                               | RN, LVN                                           | RN, LVN                                           | RN, LVN                                           | RN, LVN                                           | RN                  | RN                                         | RN, LVN                                        | RN, LVN                                        |
| Type of second responder                 | NP                                | NP, ED MD                    | NP, ED charge RN, ICU charge RN | NP, ICU charge RN            | NP, ICU charge RN            | NP, CCU charge RN                                                     | House supervisor RN; if orders required, house MD | House supervisor RN; if orders required, house MD | House supervisor RN; if orders required, house MD | House supervisor RN; if orders required, house MD | NP                  | Charge RN, house supervisor RN, manager RN | NP, director or assist. director of nursing RN | NP, director or assist. director of nursing RN |
| Type of local educator                   | Facility educator                 | Facility educator, sepsis NP | Facility educator, sepsis NP    | Facility educator, sepsis NP | Facility educator, sepsis NP | Facility educator, sepsis NP                                          | Facility educator                                 | Facility educator                                 | RN, RN manager                                    | RN, RN manager                                    | Facility educator   | Facility educator                          | Sepsis NP, NP, director of nursing RN          | Sepsis NP, NP, director of nursing RN          |
| First responder training completed       | M6                                | M6                           | M7                              | M11                          | M11                          | M9                                                                    | M15                                               | M15                                               | M15                                               | M15                                               | M17                 | M17                                        | M23                                            | M23                                            |
| Second responder training completed†     | M6                                | M6                           | M7                              | M11                          | M11                          | M9                                                                    | M15                                               | M15                                               | M15                                               | M15                                               | M6                  | M7                                         | M23                                            | M23                                            |
| Sepsis CMPI Committee functional         | M1                                | M8                           | M8                              | M12                          | M12                          | M10                                                                   | M15                                               | M15                                               | M15                                               | M15                                               | M1                  | M8                                         | M10                                            | M10                                            |
| Sepsis/SIRS screening tool format        | Integrated into EHR               | Integrated into EHR          | Integrated into EHR             | Integrated into EHR          | Integrated into EHR          | Screening tool integrated into EHR; paper is used for second response | Stand-alone website                               | Stand-alone website                               | Paper                                             | Paper                                             | Integrated into EHR | Integrated into EHR                        | Stand-alone website                            | Stand-alone website                            |
| Months required for integration into EHR | 0                                 | 0                            | 0                               | 6                            | 6                            | 8                                                                     | n/a                                               | n/a                                               | n/a                                               | n/a                                               | 0                   | 0                                          | n/a                                            | n/a                                            |

(continued on page AP5)

**Appendix 3. Tailoring and Staggering of Sepsis Early Recognition and Response Initiative (SERRI) Implementation Elements to Accommodate Site-Specific Realities and Conditions (continued)**

| Facility Attributes                                                    | ACH 1<br>(Convener facility, HMH) | ACH 2 | ACH 3    | ACH 4*   | ACH 5    | ACH 6     | LTACH 1  | LTACH 2  | LTACH 3  | LTACH 4  | SNF 1    | SNF 2    | SNF 3     | SNF 4       |
|------------------------------------------------------------------------|-----------------------------------|-------|----------|----------|----------|-----------|----------|----------|----------|----------|----------|----------|-----------|-------------|
| Months required to bring Web-based tool on line                        | n/a                               | n/a   | n/a      | n/a      | n/a      | n/a       | 12       | 12       | 15       | 15       | n/a      | n/a      | est. 24   | est. 24     |
| Start of SERRI pilot                                                   | M6                                | M7    | M8       | M12      | M12      | M9        | M16      | M16      | M16      | M16      | M17      | M17      | M24       | M24         |
| Launch of full SERRI program at all designated site units and patients | M19                               | M19   | M8       | M12      | M12      | M22       | M16      | M16      | M16      | M16      | M17      | M17      | M24       | Target: M25 |
| Qualitative assessment of site-level SERRI leadership†                 | Both                              | Both  | Top down | Top down | Top down | Bottom up | Top down | Bottom up | Bottom up   |

ACH, acute care hospital; HMH, Houston Methodist Hospital; LTACH, long term acute care hospital; SNF, skilled nursing facility; LVN, licensed vocational nurse; NP, nurse practitioner; ED, emergency department; CCU, coronary care unit; M, month of the 36-month project period in which the element was completed; CMPI, Care Management Performance Improvement; SIRS, systemic inflammatory response syndrome; EHR, electronic health record; n/a, not applicable; est., estimated.

\* This site has two campuses separated by more than 10 miles but operates under one license.

† Month given is when a critical mass of second responders completed training before SERRI was launched at the site. After the launch, newly hired or newly designated second responders are trained as needed on an ongoing basis.

‡ Represents the SERRI Program Office's qualitative assessment of the site's organizational level from which most of the SERRI impetus for SERRI implementation comes. When both top-down and bottom-up leadership exist at a site, it is considered to be a mark of a mature SERRI program that will be sustainable without the efforts of the SERRI Program Office and Centers for Medicare & Medicaid grant funding.

Appendix 4. Sepsis Early Recognition and Response Initiative (SERRI) Program Site Implementation Assessment

# SERRI Program

*Sepsis Early Recognition and Response Initiative*

### SITE IMPLEMENTATION ASSESSMENT:

This is a tool to help you think through the key decisions that need to be made prior to implementing the SERRI program on nursing units.

### TRAINING TIMELINE:

- 1) Please help us make sure that the right individuals at your organization are aware of the target completion dates for the below activities. We're aware that each facility has its own challenges, and these can be adjusted as appropriate:

| Task                                                                 | Target Completion /<br>Timeframe |
|----------------------------------------------------------------------|----------------------------------|
| Train the Trainer                                                    |                                  |
| Second Level Responder –<br>Simulation Training<br>(Simulation Lab)* |                                  |
| Bedside Nurse training                                               |                                  |
| LVN / PCA Training                                                   |                                  |
| Target Go-Live                                                       |                                  |

\*Prerequisite - Complete Sepsis Comprehensive Online Coursework

### CLINICAL IMPLEMENTATION PREPARATION PLAN:

- 2) What units do you plan to roll out sepsis screening in? \_\_\_\_\_  
\_\_\_\_\_
- 3) What time frame do you plan to implement the screening to take place daily? \_\_\_\_\_  
\_\_\_\_\_
- 4) Do you have an ongoing training plan in place? \_\_\_\_\_  
\_\_\_\_\_
- 5) Who will be appointed as super-users? \_\_\_\_\_  
\_\_\_\_\_
- 6) When will patients who have a positive sepsis screen be reviewed? \_\_\_\_\_  
\_\_\_\_\_

(continued on page AP7)

**Appendix 4. Sepsis Early Recognition and Response Initiative (SERRI) Program  
Site Implementation Assessment (continued)**

- 7) Who will perform weekly assessments on compliance with random spot checks? \_\_\_\_\_  
\_\_\_\_\_
- 8) How will the bedside nurses' online training and testing be handled? How will completion of training be tracked/documented: \_\_\_\_\_  
\_\_\_\_\_
- 9) How will the sepsis training be incorporated into nurses' annual competency? \_\_\_\_\_  
\_\_\_\_\_
- 10) Do you have any screening tools in place currently? \_\_\_\_\_  
\_\_\_\_\_
- 11) How will your facility handle a positive screen? \_\_\_\_\_  
\_\_\_\_\_
- 12) Do you have any training material/setup preference? \_\_\_\_\_  
\_\_\_\_\_
- 13) Would you like to tour one of our sepsis screening units? \_\_\_\_\_  
\_\_\_\_\_
- If so, please contact your Site Liaison.***
- 14) What is the procedure and clearance for the Site Liaison to tour your site to get a better sense of your facility to further assist you in a more customized way? \_\_\_\_\_  
\_\_\_\_\_

**SITE LIAISON CONTACT INFORMATION:**

Name  
Post-Acute Care Site Liaison  
Phone:  
Email:

Name  
Acute Care Site Liaison  
Phone:  
Email:

The project described was supported by Grant Number 1C1CMS330975-01-00 from the U.S. Department of Health and Human Services, Centers for Medicare & Medicaid Services. The contents of these slides are solely the responsibility of the authors and do not necessarily represent the official views of the U.S. Department of Health and Human Services or any of its agencies. The research presented was conducted by Houston Methodist. Findings might or might not be consistent with or confirmed by the findings of the independent evaluation contractor.

LVN, licensed vocational nurse; PCA, patient care assistant.
